# Supplementary material
Source: PubMed Central journal article supplement (PMC4863212)
Supplement: aasm.39.6.1241s1.pdf [file aasm.39.6.1241s1.pdf]

**Table S1**—Polysomnographic characteristics of the children with type 1 narcolepsy

| Variable                                                                                                                                                                                                                                                                                                    | Mean $\pm$ SD      | Range       |
|-------------------------------------------------------------------------------------------------------------------------------------------------------------------------------------------------------------------------------------------------------------------------------------------------------------|--------------------|-------------|
| <i>Nocturnal PSG</i>                                                                                                                                                                                                                                                                                        |                    |             |
| TIB, (min)                                                                                                                                                                                                                                                                                                  | 512.63 $\pm$ 36.09 | 415.5-573.5 |
| TST, (min)                                                                                                                                                                                                                                                                                                  | 460 $\pm$ 50.54    | 370-544.5   |
| Sleep latency, (min)                                                                                                                                                                                                                                                                                        | 4.45 $\pm$ 7.31    | 0.5-32      |
| REM sleep latency, (min)                                                                                                                                                                                                                                                                                    | 27.34 $\pm$ 57.35  | 0.5-222     |
| Sleep efficiency, (%)                                                                                                                                                                                                                                                                                       | 89.66 $\pm$ 7.99   | 64.60-97.80 |
| N1, (% of TST)                                                                                                                                                                                                                                                                                              | 10.74 $\pm$ 5.41   | 0.80-21.53  |
| N2, (% of TST)                                                                                                                                                                                                                                                                                              | 42.03 $\pm$ 7.81   | 21.20-49.90 |
| N3, (% of TST)                                                                                                                                                                                                                                                                                              | 23 $\pm$ 10.07     | 10.38-52.50 |
| REM (% of TST)                                                                                                                                                                                                                                                                                              | 24.23 $\pm$ 5.77   | 13.60-37.50 |
| TIB, time in bed (min); TST, total sleep time (min); N1, percentage of total sleep time spent in non-REM sleep stage 1;N2 percentage of total sleep time spent in non-REM sleep stage 2;N3 percentage of total sleep time spent in slow wave sleep; REM, percentage of total sleep time spent in REM sleep. |                    |             |
